# Supplementary material for: Thermodynamic Characterization of the Ca2+-Dependent Interaction Between SOUL and ALG-2
Source: PubMed Central journal article supplement (PMC6321638; doi:10.3390/ijms19123802), 2018-11-29
Supplement: ijms-19-03802-s001.pdf [file ijms-19-03802-s001.pdf]

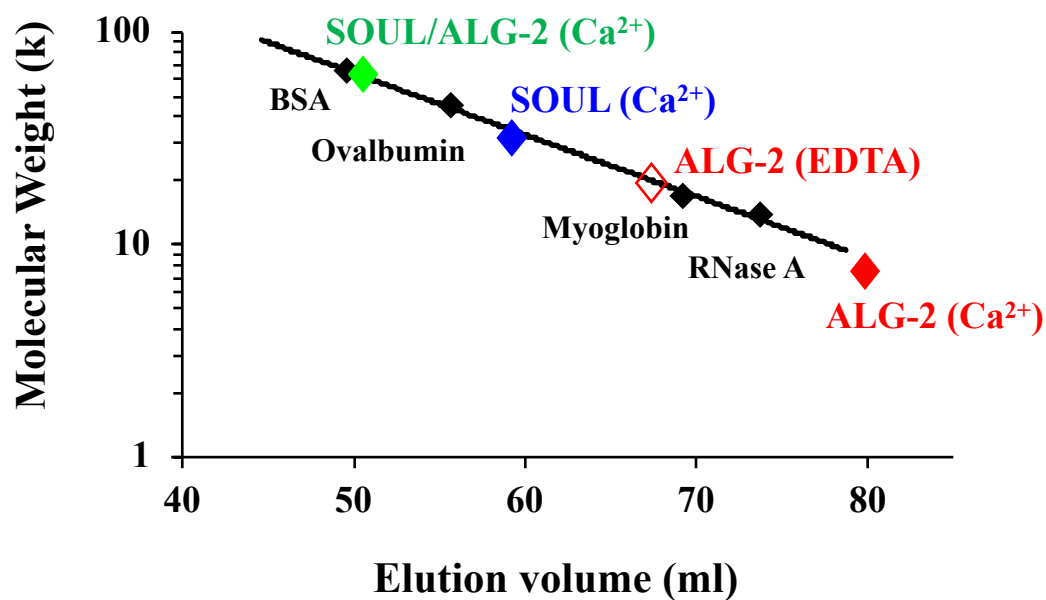

**Figure S1.** Correlation between the elution volumes of gel filtration and molecular weights of various proteins. His-SOUL<sup>WT</sup>/delta2-23ALG-2<sup>WT</sup> complex (filled green), SOUL<sup>WT</sup> (filled blue), delta3-23ALG-2<sup>WT</sup> (filled red) in the presence of Ca<sup>2+</sup>, and delta2-23ALG-2<sup>WT</sup> (open red) in the presence of EDTA.

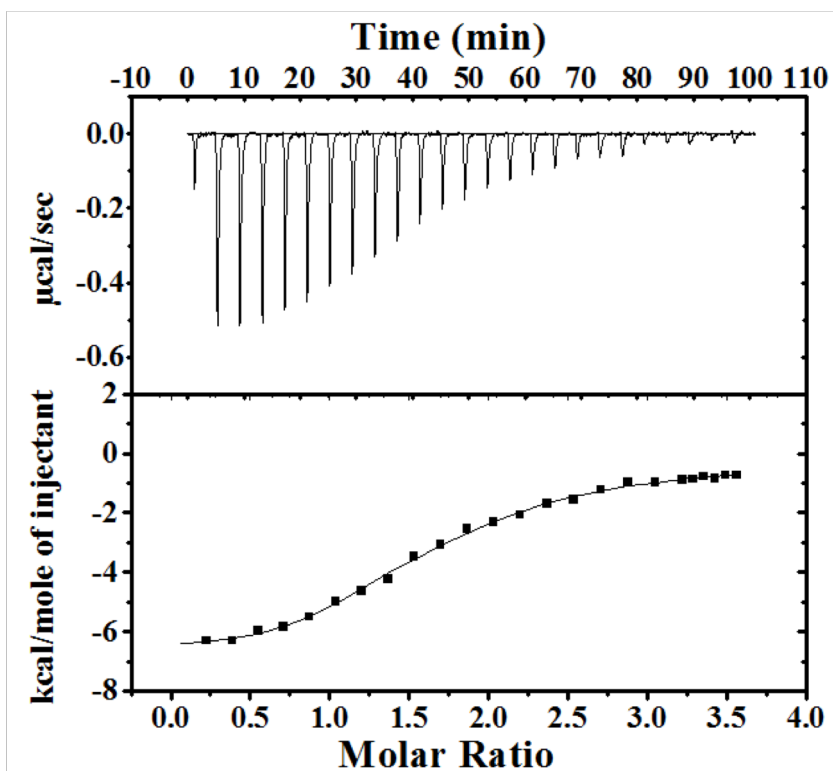

**Figure S2.** Determination of  $\text{Ca}^{2+}$ -binding parameters by ITC. Typical calorimetric titrations (A) and the resulting integrated binding isotherm (B) at  $25^\circ\text{C}$ , pH 7.5 in buffer C. After subtracting the heat of ligand dilution, the solid line connecting the integrated data points was obtained from a three-set-of-sites model fitting using a nonlinear least-squares method.

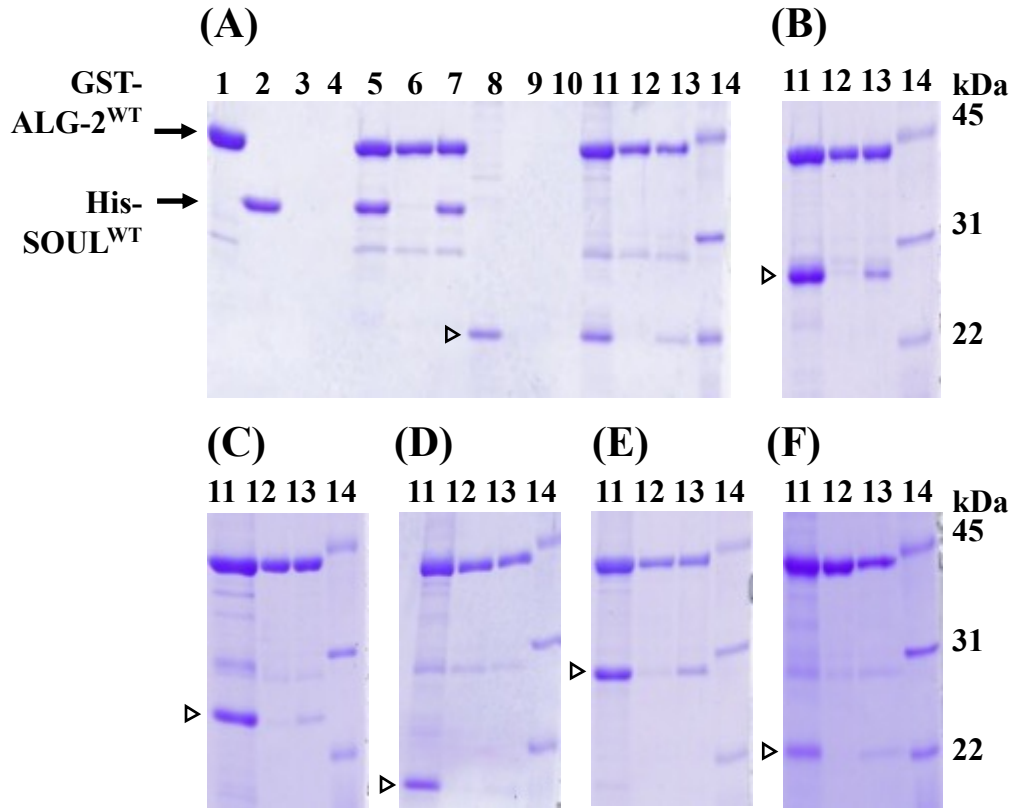

**Figure S3.** GST-pulldown assays using SOUL mutants.

GST-ALG-2<sup>WT</sup> protein was incubated with His-SOUL wild-type(WT), 1-111 (A), 1-143 (B), 56-205 (C), 102-205 (D), 1-111/126-205 (E), and 36-111/126-205 (F).

The bound proteins were analyzed in 12.5%SDS-PAGE.

1: GST-ALG-2<sup>WT</sup> input, 2: His-SOUL<sup>WT</sup> input, 3:His-SOUL<sup>WT</sup> with 1 mM EGTA eluate, 4: His-SOUL<sup>WT</sup> with 20  $\mu$ M CaCl<sub>2</sub> eluate, 5: GST-ALG-2<sup>WT</sup>+ His-SOUL<sup>WT</sup> input, 6: GST-ALG-2<sup>WT</sup>+ His-SOUL<sup>WT</sup> with 1 mM EGTA, 7: GST-ALG-2<sup>WT</sup>+ His-SOUL<sup>WT</sup> with 20  $\mu$ M CaCl<sub>2</sub>, 8: His-SOUL mutant input, 9: His-SOUL mutant with 1 mM EGTA , 10: His-SOUL mutant with 20  $\mu$ M CaCl<sub>2</sub>, 11: GST-ALG-2<sup>WT</sup> + His-SOUL mutant input, 12: GST-ALG-2<sup>WT</sup>+ His-SOUL mutant with 1 mM EGTA, 13: GST-ALG-2<sup>WT</sup>+ His-SOUL mutant with 20  $\mu$ M CaCl<sub>2</sub>, 14: protein marker. Each triangle indicates each mutant.

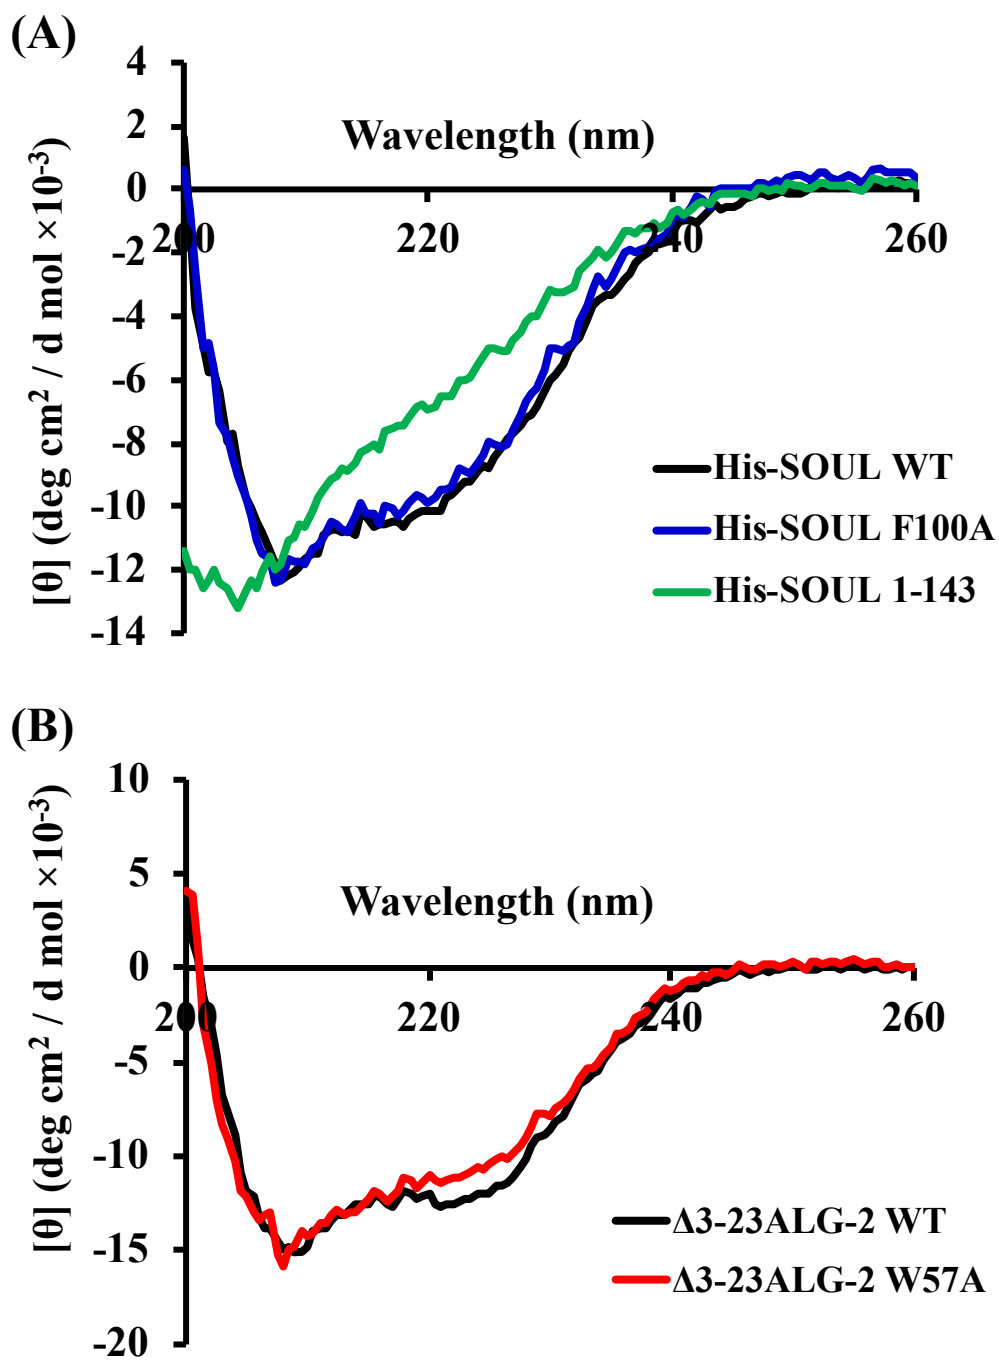

**Figure S4.** Circular dichroism (CD) spectra of SOULs (A) and ALG-2s (B). CD spectra were obtained at 20°C from 260 to 200 nm. Scanning rate was set to 50 nm/min. Loading concentrations of proteins were 5 μM in a buffer B. The background signal from the buffer solution was subtracted from each spectrum.

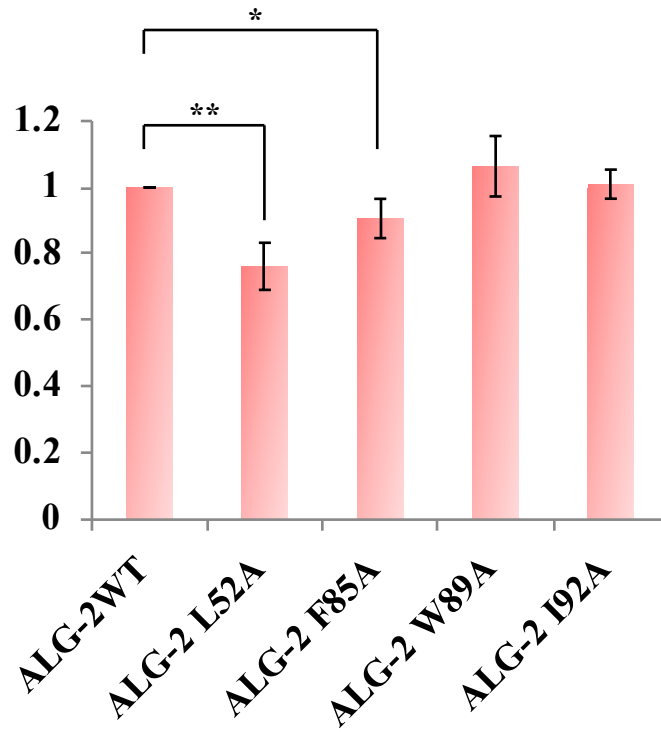

**Figure S5.** Interaction between GST-ALG-2 mutant and His-SOUL<sup>WT</sup>. GST-pulldown assays were performed using various purified mutants of GST-ALG-2 (5  $\mu$ M) and purified His-SOUL<sup>WT</sup> (5  $\mu$ M) proteins in the presence of 20  $\mu$ M Ca<sup>2+</sup>. The intensity of the bands stained after SDS-PAGE was quantified by Multi Gauge version 2.1 and is represented as a relative value normalized to the value obtained with His-SOUL<sup>WT</sup> and GST-ALG-2<sup>WT</sup>. Each value is the mean of at least three independent experiments  $\pm$  SD. \*P < 0.05, \*\*P < 0.01

## mSOUL Primers

|                |                                             |
|----------------|---------------------------------------------|
| N2s            | : 5'-CGGGATCCCATATGGCAGAGGAGCC-3'           |
| 205Stopa       | : 5'-GCAAGCTTATTTGTTCTCGACGGAGG-3'          |
| 143Stopa       | : 5'-GCAAGCTTAATCAAAAGACCGCACGAACAC-3'      |
| 111Cla1a       | : 5'-GGATCCATCGATGTACAGGGAAATCGTAATGGTAG-3' |
| 126Cla1s       | : 5'-CATATGATCGATGTCTTCATTGAAGACAGAGCTG-3'  |
| 36s            | : 5'-CGGGATCCCATATGGGAAGTTATGAGATCC-3'      |
| 56s            | : 5'-GGGATCCCATATGCTGGACTGGGATTCAGC-3'      |
| 111Stopa       | : 5'-GCAAGCTTAGATGTACAGGGAAATCGTAATGG-3'    |
| 102a           | : 5'-GGGATCCCATATGGAGTCTACCATTACG-5'        |
| F100A          |                                             |
| Forward primer | : 5'-CCGGCTCAAGTCCTGCGAGTGAGTCTACCATTACG-3' |
| Reverse primer | : 5'-CGTAATGGTAGACTCACTCGCAGGACTTGAGCCGG-3' |

## ALG-2 Primers

|                |                                               |
|----------------|-----------------------------------------------|
| Delat3-23      |                                               |
| Forward primer | : 5'- CGGGATCCCATATGGCTGACCAGAGCTTCCTGTGG-3'  |
| Reverse primer | : 5'- GCGGATCCTTATACAATGCTGAAGACCATGGAGAG-3'  |
| L52A           |                                               |
| Forward primer | : 5'- GAGCTTCAGCAAGCAGCGTCCAATGGTACATGGAC-3'  |
| Reverse primer | : 5'- GTCCATGTACCATTGGACGCTGCTTGCTGAAGCTC-3'  |
| W57A           |                                               |
| Forward primer | : 5'- GCATTATCCAATGGTACAGCGACTCCATTTAACCC -3' |
| Reverse primer | : 5'- GGGTTAAATGGAGTCGCTGTACCATTGGATAATGC-3'  |
| F85A           |                                               |
| Forward primer | : 5'- GTGTGAACTTCAGTGAAGCGACGGGTGTGTGGAAG-3'  |
| Reverse primer | : 5'- CTTCCACACACCCGTCGCTTCACTGAAGTTCACAC -3' |
| W89A           |                                               |
| Forward primer | : 5'- CAGTGAATTCACGGGTGTGGCGAAGTATATCACAG-3'  |
| Reverse primer | : 5'- CTGTGATATACTTCGCCACACCCGTGAATTCAGT-3'   |
| I92A           |                                               |
| Forward primer | : 5'- GGGTGTGTGGAAGTATGCGACAGACTGGCAGAATG -3' |
| Reverse primer | : 5'- CATTCTGCCAGTCTGTTCGATACTTCCACACACCC-3'  |

**Figure S6.** Primers for plasmid construction
